# Supplementary material for: Negative Impacts of Pandemic Induced At-Home Remote Learning Can Be Mitigated by Parental Involvement
Source: Frontiers journal article supplement (doi:10.3389/feduc.2022.804191), 2022-03-17
Supplement: Data_Sheet_1.PDF [file Data_Sheet_1.PDF]

### A. Questionnaire items

We designed the following questions (and response choices) in the current study:

1. **Schooling:** In the past week, was your schooling taking place: (a) Online/school-at-home (b) In person (c) In person some days and online some other days (d) Other
2. **Emotion:** How much did you enjoy school/school-at-home in the past week: (a) Very enjoyable (b) Quite enjoyable (c) Neutral (d) Quite unpleasant (e) Very unpleasant
3. **Reading:** In the past week on an average weekday, how many hours per day did you spend doing school or school-like activities, including online or in-person school? (a) 0 (b) 15 minutes (c) 30 minutes (d) 45 minutes (e) 1 hour (f) 1.5 hours (g) 2 hours (h) 3 hours (i) 4 hours (j) > 4 hours (k) Don't know
4. **Language Arts:** In the past week on an average weekday, how many hours per day did you spend doing school or school-like activities, including online or in-person school? (a) 0 (b) 15 minutes (c) 30 minutes (d) 45 minutes (e) 1 hour (f) 1.5 hours (g) 2 hours (h) 3 hours (i) 4 hours (j) > 4 hours (k) Don't know
5. **Social Studies:** In the past week on an average weekday, how many hours per day did you spend doing school or school-like activities, including online or in-person school? (a) 0 (b) 15 minutes (c) 30 minutes (d) 45 minutes (e) 1 hour (f) 1.5 hours (g) 2 hours (h) 3 hours (i) 4 hours (j) > 4 hours (k) Don't know
6. **Math:** In the past week on an average weekday, how many hours per day did you spend doing school or school-like activities, including online or in-person school? (a) 0 (b) 15 minutes (c) 30 minutes (d) 45 minutes (e) 1 hour (f) 1.5 hours (g) 2 hours (h) 3 hours (i) 4 hours (j) > 4 hours (k) Don't know
7. **Science:** In the past week on an average weekday, how many hours per day did you spend doing school or school-like activities, including online or in-person school? (a) 0 (b) 15 minutes (c) 30 minutes (d) 45 minutes (e) 1 hour (f) 1.5 hours (g) 2 hours (h) 3 hours (i) 4 hours (j) > 4 hours (k) Don't know
8. **Other:** In the past week on an average weekday, how many hours per day did you spend doing school or school-like activities, including online or in-person school? (a) 0 (b) 15 minutes (c) 30 minutes (d) 45 minutes (e) 1 hour (f) 1.5 hours (g) 2 hours (h) 3 hours (i) 4 hours (j) > 4 hours (k) Don't know
9. **Manage:** In the past week, how many days (0 to 7) did your parents assist you with managing school schedule (a) 0 (b) 1 (c) 2 (d) 3 (e) 4 (f) 5 (g) 6 (h) 7 (i) Don't know
10. **Homework:** In the past week, how many days (0 to 7) did your parents check homework and assignments with you (a) 0 (b) 1 (c) 2 (d) 3 (e) 4 (f) 5 (g) 6 (h) 7 (i) Don't know
11. **Teach:** In the past week, how many days (0 to 7) did your parents directly teach you concepts (a) 0 (b) 1 (c) 2 (d) 3 (e) 4 (f) 5 (g) 6 (h) 7 (i) Don't know
12. **Create:** In the past week, how many days (0 to 7) did your parents create assignments and activities beyond what your school assigned (a) 0 (b) 1 (c) 2 (d) 3 (e) 4 (f) 5 (g) 6 (h) 7 (i) Don't know

## B. Validity and Reliability

In this section, we discuss in more details and provide data from additional analyses to support the validity and reliability of our survey items.

Regarding validity, our questions were straightforward (see previous section), but response choices might have been limited in a way that participants could not have chosen a suitable response. We checked content validity by measuring how many *I don't know* and *Other* responses were provided by participating youth. We assumed that these response choices reflect the inability to respond due to uncertainty in respondents' mind but also – at least partially – the uncertainty and/or incompleteness in the response choices provided. Across all items, participants responded *I don't know/Other* in only 2.41% of cases; meaning that they selected another choice in 97.59% of the cases. Considering that only a fraction of these missing responses could reflect a bias in our response choices, we can assume that our survey items overall provide a valid description of respondents' behavior.

With respect to reliability, we took advantage of the longitudinal of the study to assess test-retest reliability. We performed additional analyses to verify that our questionnaire data were reliable across the three time points. We measured pairwise correlations of each measure of interest across the three time points, restricting our analyses to individuals who completed all three surveys ( $N = 2745$ ). Pearson correlation coefficients are presented in Table 1. All values were significant at  $p < 0.001$ , demonstrating that the measures were consistent over time, and therefore supporting that our items were reliable.

**Table 1**

*Pairwise correlation matrix (Pearson coefficients) between the time points.*

| Variable | Oct-Dec | Oct-Feb | Dec-Feb |
|----------|---------|---------|---------|
| Emotion  | .50     | .41     | .46     |
| Reading  | .34     | .27     | .32     |
| Language | .34     | .33     | .31     |
| Social   | .37     | .33     | .27     |
| Math     | .33     | .34     | .27     |
| Science  | .36     | .30     | .25     |
| Other    | .38     | .37     | .44     |
| Manage   | .50     | .37     | .48     |
| Homework | .50     | .43     | .52     |
| Teach    | .54     | .48     | .56     |
| Create   | .49     | .43     | .56     |

### C. Additional figures

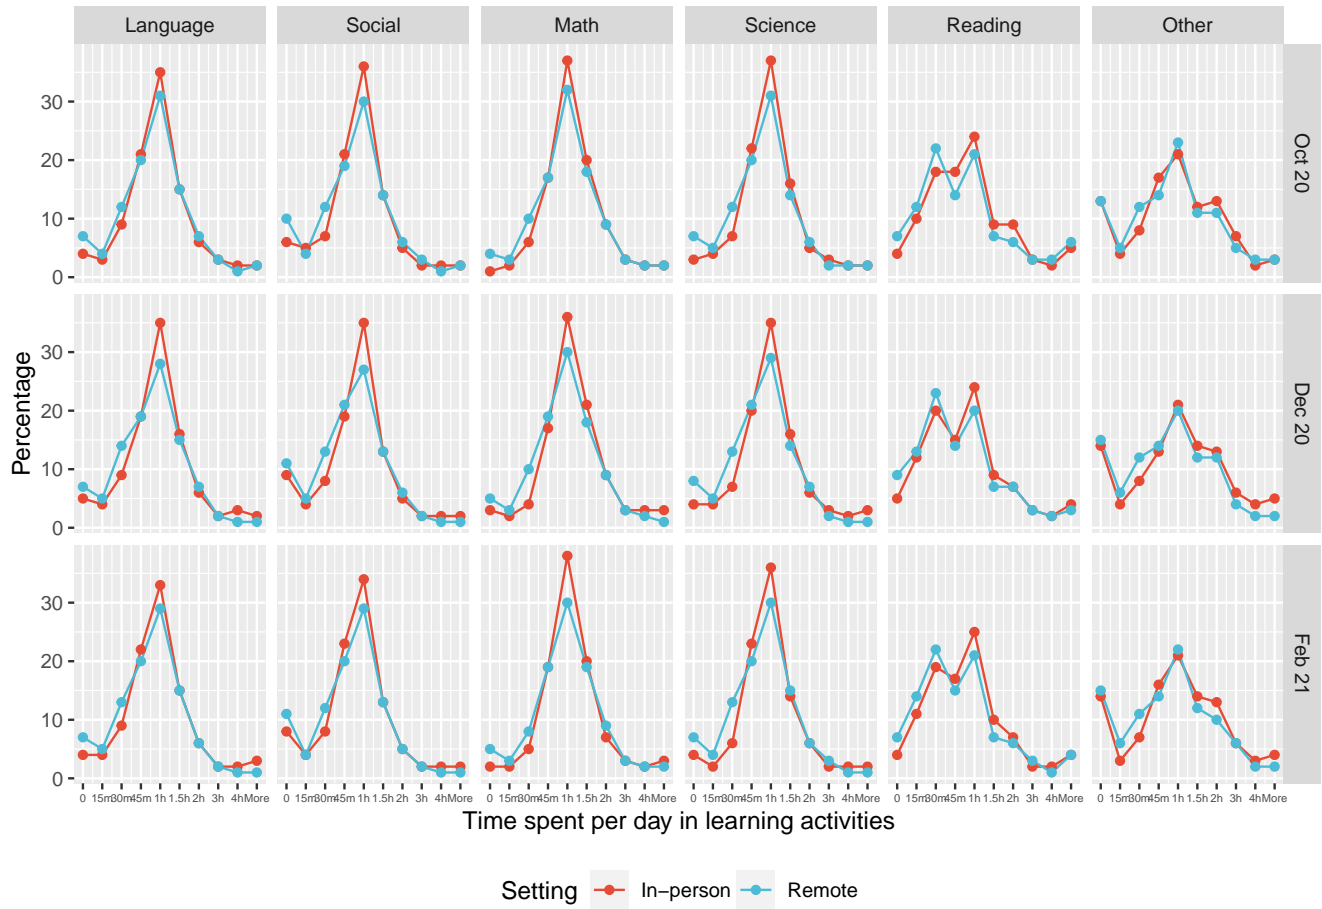

**Figure 1**

*Response distribution (in percent) relative to time spent on several learning activities, as a function of school setting (on-site or remote) and timepoint (Oct 20, Dec 20, or Feb 21).*

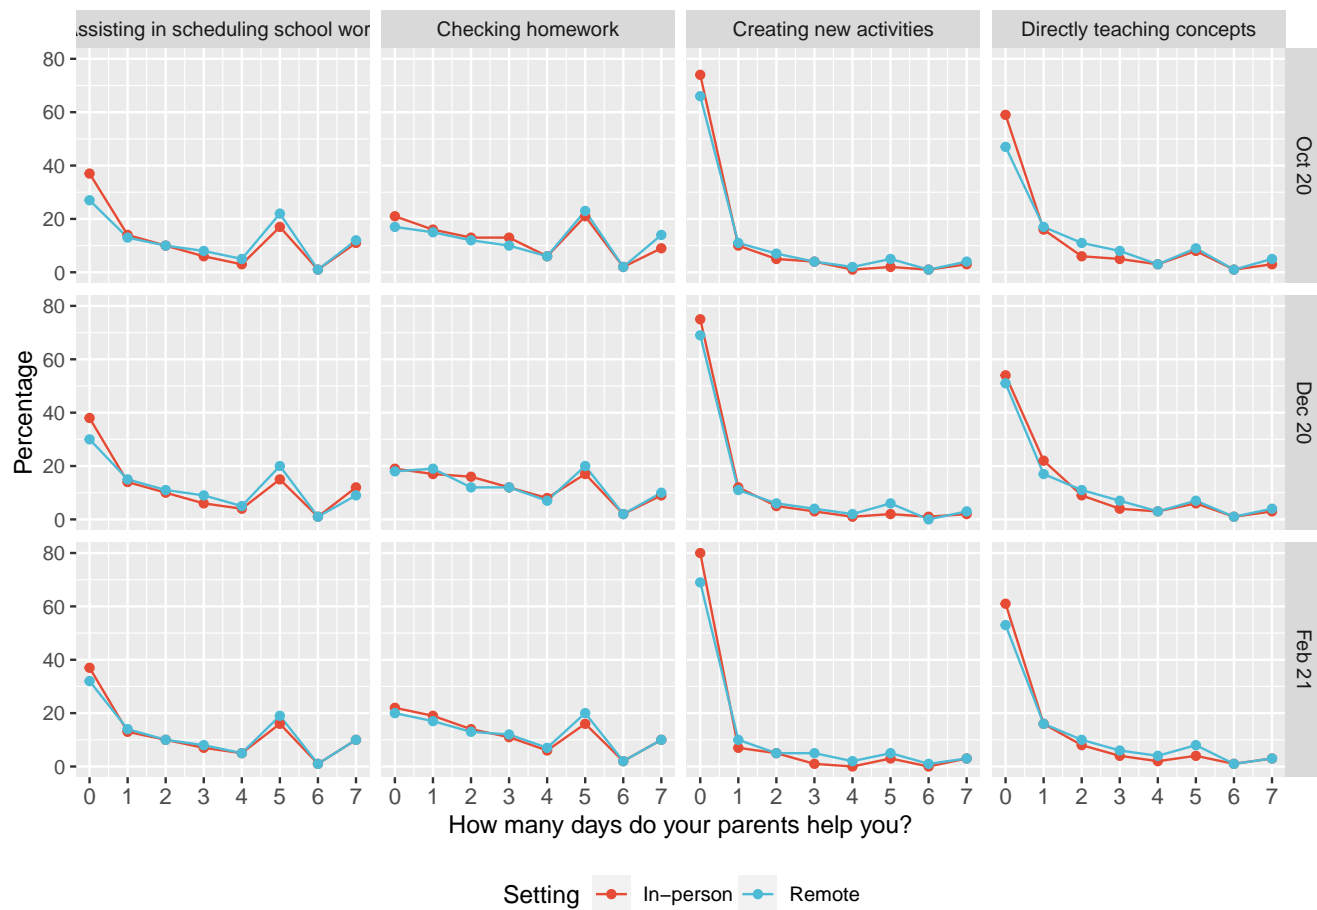

**Figure 2**

*Response distribution (in percent) regarding parental involvement (assisting in scheduling school work, checking homework, creating new activities, and directly teaching concepts) as a function of school setting (on-site or remote) and timepoint (Oct 20, Dec 20, or Feb 21).*
